# Supplementary material
Source: MDPI journal article supplement (https://www.mdpi.com/2673-4591/4/1/5)
Supplement: s1 [file s1]

**ICMA  
2021**

# 1st International Conference on Micromachines and Applications

15–30 APRIL 2021 | ONLINE



*micromachines*



## Precise Layer Separation of Two-Dimensional Nanomaterials for Scalable Optoelectronics

Joohoon Kang <sup>1,\*</sup>

<sup>1</sup> School of Advanced Materials Science and Engineering,  
Sungkyunkwan University (SKKU)

\* Corresponding author: [joohoon@skku.edu](mailto:joohoon@skku.edu)

# Introduction

## Biography

- BS and MS at Yonsei University (MSE)
- PhD at Northwestern University (MSE)
- Postdoc at UC Berkeley (Chemistry)
- Assistant Professor at SKKU (MSE)



## Research Interests

- *Nanomaterials **processing** for optoelectronic devices*
- Nanomaterials: Carbon nanotubes, graphene-like 2D materials, perovskites
- Devices: Field effect transistor (FET), photodetector, light emitting diodes (LED)

# Acknowledgement



Prof. Mark C. Hersam

Prof. Lincoln Lauhon

Prof. Koray Aydin

Prof. Deep Jariwala

Prof. Paul Alivisatos

Prof. Jian Zhu

Prof. Jeong Ho Cho

Prof. Hong-Sub Lee

Prof. Jia Lin



Prof. Peidong Yang

Dr. Josh Wood

Dr. Vinod Sangwan

Dr. Chad Husko

Dr. Xiaolong Liu

Dr. Spencer Wells

Qiao Kong

Hersam Group Members

Yang Group Members



Northwestern  
University



Berkeley  
UNIVERSITY OF CALIFORNIA

## Hersam Group Members



## Yang Group Members



# Wavelength of light

## ❖ Electromagnetic Spectrum



## ❖ Why 1550 nm?

- Wavelength dependent optical loss in silica
- Minimum attenuation at 1550 nm
- “C-band” – 1530 nm to 1560 nm



# Optical telecommunications

❖ Light delivers information through optical fiber



➤ The worldwide optical fiber network enables high-speed telecommunications

# Optoelectronics

## ❖ Electron-photon interaction



# Silicon for optoelectronics

## ❖ Optical properties of silicon



- Indirect bandgap – low photon-electron conversion efficiency
- Bandgap mismatch (1.12 eV at room temperature)
- *Requires gain medium*: direct bandgap III-V semiconductors (e.g., **InGaAs – 0.8 eV**)
- InGaAs – complicated process, ineffective production cost, fatal gases, etc.

# Two-dimensional semiconductors

## ❖ Structure-dependent optical properties

Phosphorene

III-VI compounds

TMDCs

2D perovskites



| Materials                 | 1L          | 2L         | 3L                | Bulk       |
|---------------------------|-------------|------------|-------------------|------------|
| Phosphorene               | 1.88 eV (D) | 1.3 eV (D) | <b>0.9 eV (D)</b> | 0.3 eV (D) |
| III-VI (InSe)             | 2.6 eV (I)  | 1.9 eV (I) | 1.7 eV (D)        | 1.3 eV (D) |
| TMDCs (MoS <sub>2</sub> ) | 1.9 eV (D)  | 1.6 eV (I) | 1.5 eV (I)        | 1.3 eV (I) |
| 2D perovskites (CsPbBr)   | 3 eV (D)    | 2.7 eV (D) | 2.5 eV (D)        | 2.3 eV (D) |



# Black phosphorus

## ❖ Structure-dependent optical properties



- Ideal properties for optical communication
- 0.8 eV (3L - 5L), direct bandgap
- Except for 3L - 5L can be scattering sources
- Chemical degradation under ambient
- Goal: to produce large quantity 3L – 5L BP without chemical degradation



# Solution processing

❖ *Maximize* dispersion stability, *minimize* processing residue

$$\frac{\Delta H_{mix}}{V} \approx \frac{2}{T_{2D}} (\sqrt{E_{S,solvent}} - \sqrt{E_{S,2D}})^2 \phi_{2D}$$

2D Materials



NMP

water

IPA



➤ Good to stabilize, but hard to remove residual solvent due to high boiling point

# Solution processing

❖ *Maximize* dispersion stability, *minimize* processing residue

## (1) High $T_b$ NMP (2015)

$E_s$  matching



## (2) Water + SDS (2016)

Amphiphilic surfactant  
- Sodium dodecyl sulfate (SDS)



## (3) Water + alcohol (2018)

High  $E_s$  + low  $E_s$  = Tunable  $E_s$



# Oxidation during the process

## ❖ Minimize oxygen exposure



# Solution processing

❖ *Maximize* dispersion stability, *minimize* processing residue



- **Stable** 2D semiconductor dispersions in **largescale**
- Co-solvent approach **minimizes processing residues**
- Monolayer to multilayer in each dispersion – *mixed layer-dependent properties*
- *How to extract targeted layer thickness in largescale?*

# Preferred sample thickness for telecommunications

- ❖ Targeted thickness sorting from polydisperse solution



# Layer sorting via density gradient ultracentrifugation

## ❖ Buoyant density differentiation



## ❖ Why monolayer?



➤ Monodisperse MoS<sub>2</sub> dispersion (1L enrichment > 90%)

# Density gradient ultracentrifugation (DGU)

## ❖ Sedimentation-based DGU



**sDGU**

- Separation based on weight
- Lower speed
- Stop at proper time
- Not completely sedimented
- **Suitable for size sorting**

## ❖ Isopycnic DGU



**iDGU**

- Separation based on density
- High speed
- Long running time
- Completely sedimented
- **Suitable for layer sorting**



# Density gradient ultracentrifugation (DGU)

## ❖ Buoyant density of 2D-surfactant composite



$$\rho(N) = \frac{\rho_S N + 2m_{surf}\sigma + 2\rho_{H_2O}t_H}{(N+1)t_{MoS_2} + 2t_A + 2t_H}$$

$\rho_s$  = sheet density

$\rho_{H_2O}$  = water density

$N$  = number of layers

$t_H$  = hydration layer thickness

$m_{sc}$  = surfactant mass

$t_{MoS_2}$  = MoS<sub>2</sub> thickness

$\sigma$  = packing density

$t_A$  = anhydrous layer thickness

## ❖ Layer-dependent buoyant density



# Density gradient ultracentrifugation (DGU)

## ❖ MoS<sub>2</sub> layer separation



- Layer separation based on the buoyant density via DGU
- f7 – 90% 1L enriched (strong photoluminescence emission)

# Density gradient ultracentrifugation (DGU)

## ❖ Other examples

### Insulating hexagonal boron nitride (h-BN)



### Heaviest TMDCs (ReS<sub>2</sub>)



- Layer separation based on the buoyant density via DGU
- Graphene (metal), hexagonal boron nitride (insulator), transition metal dichalcogenides (semiconductors) including MoS<sub>2</sub>, WS<sub>2</sub>, MoSe<sub>2</sub>, WSe<sub>2</sub>, and ReS<sub>2</sub>
- Enabling layer-dependent studies/uniform thin-film formation in largescale

# Processing BP for NIR light generator

## ❖ Mass production of targeted material

### Material choice

- Black phosphorus crystal



### Materials synthesis

- Oxygen-free processing



### Materials processing

- High quality/purity



# Processing BP for NIR light generator

## ❖ Transfer and device evaluation

**Dry transfer**  
- Si nanocavity



**Device evaluation**  
- Emission at NIR wavelength



**Tunability**  
- Tunable wavelength



- Strong light amplification in the ideal range of NIR applications
- Tunable wavelength based on the Si nanocavity structure
- **Optically pumped light generation**

# High-performance phototransistor



- Residue-free, solution-processed InSe-based phototransistor.
- The device exhibits the *highest* photoresponsivity ( $>10^7$  A/W) and among the *fastest* photoresponse time.
- **FLATFORM** formation for scaling up.



# Thin-film photodetector

## “III-VI FLATFORM”



- III-VI FLATFORM-based photodetector
- Co-solvent process enables high-quality thin-film (4 orders improved electrical conductivity)
- *Best* thin-film based photoresponsivity

# Electrically-pumped light generation

## ❖ Single-crystalline Ruddlesden-Popper phase perovskites



- Ruddlesden-Popper phase quasi-2D layered perovskite– (BA)CsPbBr
- Layer-dependent optical properties from violet, blue, to skyblue emission



# Electrically-pumped light generation

## ❖ LED emitting intrinsic bandgap wavelengths



- Direct exfoliation of RP perovskite unlike the conventional spin-coating based approach
- Avoiding the energy funneling behavior (Green emission from blue emitters)
- Electrically-pumped bandgap wavelength emission
- **Applicable for electrically-driven BP-based NIR emitter (ongoing)**

# Summary

- ❖ Scalable production of electronically- and optically-active nanomaterials via solution-based processing.
- ❖ Deoxygenated processing minimizes chemical reaction during the solution-based processing
- ❖ Density gradient ultracentrifugation originated from biochemistry allows to maximize monodispersity of nanomaterials in structure.
- ❖ Solution-processed high-purity semiconducting materials directly applied to photonic device applications.

# Thank you for your attention

[joocheon@skku.edu](mailto:joocheon@skku.edu)
